# Supplementary material
Source: publisher figshare collection journal article supplement (https://frontiersin.figshare.com/ndownloader/files/14652398)
Supplement: Supplementary file [file 14652398]

# Supplementary Material: Article Title

Amanda Ramcharan\*, Peter McCloskey, Kelsee Baranowski, Neema Mbilinyi,  
Latifa Mrisho, Mathias Ndalawa, James Legg, and David Hughes

\*Correspondence:

Author Name: Amanda Ramcharan  
amr418@psu.edu, dph14@psu.edu

David Hughes: dph14@psu.edu

## 1 ANNOTATION EXPERIMENT RESULTS

The mean average precision (mAP) across all classes as well as for each class for the annotation experiment are reported in Supplementary Table 1. These metrics were then repeated for the in-field model assessment of the mobile CNN model for annotation style 1 (whole leaflet).

## 2 SUPPLEMENTARY TABLES AND FIGURES

**Table S1.** Mean average precision for 3 annotation styles studied

| Annotation Style                    | mAP  | Class average precision |      |      |
|-------------------------------------|------|-------------------------|------|------|
|                                     |      | CBSD                    | CMD  | CGM  |
| 1 - whole leaflet                   | 71.9 | 66.4                    | 66.0 | 83.2 |
| 2 - within leaflet                  | 13.6 | 17.1                    | 11.9 | 11.8 |
| 3 - combined whole + within leaflet | 10.9 | 15.0                    | 9.33 | 8.27 |
